# Supplementary material for: Schizochytrium sp. Extracted Lipids Prevent Alopecia by Enhancing Antioxidation and Inhibiting Ferroptosis of Dermal Papilla Cells
Source: MDPI journal article supplement (doi:10.3390/antiox12071332), 2023-06-23
Supplement: s1 [file s1]

**Table S1.** Summary of the sequencing read alignment to the reference genome.

| <b>T</b>   | <b>Total Reads</b> | <b>Mapped Reads</b> | <b>%≥Q30</b> | <b>GC Content</b> |
|------------|--------------------|---------------------|--------------|-------------------|
| <b>ype</b> |                    |                     |              |                   |
| C-1        | 38,330,038         | 37,039,373 (96.63%) | 94.57%       | 48.54%            |
| C-2        | 44,091,654         | 41,740,979 (94.67%) | 94.18%       | 48.04%            |
| C-3        | 45,131,850         | 43,446,064 (96.26%) | 94.91%       | 50.27%            |
| CS-1       | 39,229,008         | 37,790,938 (96.33%) | 94.58%       | 47.36%            |
| CS-2       | 52,199,810         | 50,493,580 (96.73%) | 94.86%       | 48.23%            |
| CS-3       | 46,658,058         | 44,934,545 (96.31%) | 94.95%       | 49.39%            |
| CHS-1      | 45,110,886         | 42,902,776 (95.11%) | 94.03%       | 48.35%            |
| CHS-2      | 42,234,266         | 40,746,954 (96.48%) | 94.79%       | 48.16%            |
| CHS-3      | 44,496,668         | 42,926,550 (96.47%) | 94.91%       | 47.50%            |
| CH-1       | 42,496,126         | 41,123,328 (96.77%) | 94.98%       | 47.61%            |
| CH-2       | 42,939,662         | 41,528,889 (96.71%) | 94.79%       | 47.24%            |
| CH-3       | 51,976,310         | 50,321,083 (96.82%) | 94.56%       | 46.34%            |

**Table S2.** The gene specific primers of RT-qPCR.

| Gene name | Sequences(5'-3')                                       | ID              | Product Length (bp) |
|-----------|--------------------------------------------------------|-----------------|---------------------|
| HMOX1     | F:TCCAGCTCTTTGAGGAGTTGC<br>R:CTGAGTGTAAGGACCCATCGG     | ENSG00000100292 | 193                 |
| FTL       | F:CTACACCTACCTCTCTCTGGGCTTC<br>R:TCATGGCGTCTGGGGTTTTAC | ENSG00000087086 | 209                 |
| FTH1      | F:ACGTTTACCTGTCCATGTCTTAC<br>R:CTGCAGCTTCATCAGTTTCTC   | ENSG00000167996 | 125                 |
| NQO1      | F:CGACCTTGTGATATTCCAGTTCC<br>R:CTTTGTCATACATGGCAGCGT   | ENSG00000181019 | 122                 |
| GCLM      | F:GTCAGGGAGTTTCCAGATGTC<br>R:TCAATAGGAGGTGAAGCAATG     | ENSG00000023909 | 212                 |
| SLC7A11   | F:CAGGTTATTCTATGTTGCGTCTC<br>R:ATTATCATTGTCAAAGGGTGC   | ENSG00000151012 | 120                 |
| ACTB      | F:TTAGTTGCGTTACACCCTTTCTTG<br>R:TGCTGTCACCTTCACCGTTCC  | ENSG00000075624 | 157                 |

**Table S3.** Antibody information

| Supplier | Catalog No. | Product Description                       |
|----------|-------------|-------------------------------------------|
| Abcam    | ab68477     | Anti-Heme Oxygenase 1 antibody [EPR1390Y] |
| Abcam    | ab126704    | Anti-GCLM antibody [EPR6667]              |
| Abcam    | ab80588     | Anti-NQO1 antibody [EPR3309]              |
| Abcam    | ab75973     | Anti-Ferritin antibody [EPR3004Y]         |
| CST      | 4970T       | $\beta$ -Actin (13E5) Rabbit mAb          |
